# Supplementary material for: Randomised trial of first-line bronchial artery embolisation for non-severe haemoptysis of mild abundance
Source: PubMed Central journal article supplement — BMJ Open Respir Res. 2021 Jun 4;8(1):e000949. doi: 10.1136/bmjresp-2021-000949 (PMC8183216; doi:10.1136/bmjresp-2021-000949), 2021-06-04
Supplement: bmjresp-2021-000949supp001.pdf [file bmjresp-2021-000949supp001.pdf]

**On-line Supplement****Randomized trial of first-line bronchial artery embolization for non-severe hemoptysis of mild abundance**

Muriel Fartoukh, MD, PhD; Alexandre Demoule, MD, PhD; Olivier Sanchez, MD, PhD; Sophie Tuffet; Emmanuel Bergot, MD, PhD; Cendrine Godet, MD; Claire Andréjak, MD, PhD; Sandrine Pontier, MD; Antoine Parrot, MD; Julien Mayaux, MD; Guy Meyer, MD, PhD; Philippe Cluzel, MD, PhD; Marc Sapoval, MD, PhD; Vincent Le Penec, MD; Marie France Carette, MD, PhD; Jacques Cadranel, MD, PhD; Alexandra Rousseau, PhD; Antoine Khalil, MD, PhD; Tabassome Simon, MD, PhD; and the ARTEMHYS trial group

**Content**

- Interventions
- Potential adverse events of the interventions
- e-Table 1: Failures of the intervention, bleeding recurrence and follow-up at 30 and 90 days.
- e-Table 2: Adverse events occurring in the interventional strategy and outcome

### ***Interventions***

Patients allocated to the interventional strategy received medical therapy as per current routine practice in each center, in combination with BAE performed within 12 hours after randomization, and at least 6 hours after any intravenous infusion of terlipressin, if administered. Those allocated to the medical strategy received medical therapy alone.

*General medical measures* - Medical therapy administered to all patients, regardless of the randomization arm, included bed rest and fasting, continuous monitoring of oxygen saturation, respiratory rate, heart rate and arterial blood pressure, as described elsewhere (1). Oxygen was delivered to obtain a pulse oxymetry >90%. No attempt was made to suppress cough. Additional measures aiming at controlling persistent bleeding were left at the discretion of the attending physicians. When deemed necessary, bronchoscopic techniques used cold saline solution lavage or topical vasoconstrictive agents, and systemic terlipressin was administered at a dose of 1 mg intravenously every 4 to 6 hours. As the indications of these additional procedures were likely homogeneous in each participating center, the randomization by center was expected to limit potential bias related to their use.

*BAE procedure* - The BAE procedure was performed by experienced radiologists and standardized in all centers (2,3). A catheter was introduced into the right femoral artery using the Seldinger technique. Selective catheterization of systemic (bronchial and non-bronchial) arteries was performed, using 4 to 5 French catheters, according to etiology and bleeding site identified on MDCTA (alveolar or ground glass opacities, intra-bronchial materials), vascular mapping and abnormal findings on angiography (enlarged or tortuous arteries), or when arteries had a near-normal aspect but supplied the bleeding site. The use of microcatheter (2.4 or 2.7F) was encouraged for embolization, which mainly used acrylic beads of 500 to 1100  $\mu\text{m}$  and polyvinyl alcohol particles of 400 to 1000  $\mu\text{m}$  (2,3).

### Potential adverse events recorded

Potential complications expected to be related to the interventions were categorized into minor and major complications.

Complications related to the interventional radiological strategy could be associated with arterial catheterization, administration of contrast medium or the embolisation procedure *per se*. Minor complications were local groin puncture hematoma, vasospasm, arterial dissection or perforation, hyperthermia, dysphagia, or chest pain. Major complications included neurological events (spinal cord ischemia leading to transient or permanent paraparesis or paraplegia; transient cerebral ischemia/stroke); vascular non-neurological events (myocardial infarction, systemic ischemia other than cerebral, pulmonary infarction); hemorrhagic events (overt bleeding with one of the followings: fall in hemoglobin of  $\geq 2$  g/100 mL compared to the initial value, need for red blood cells transfusion; need for surgical cure of hematoma); metabolic events (acute renal failure); and others (contrast media hypersensitivity, diaphragmatic paralysis; femoral artery aneurysm at puncture site).

Minor complications related to the medical management included acrocyanosis, abdominal cramps, diarrhea, headache, and symptomatic hyponatremia; major complications included systemic hypertension, myocardial ischemia, ventricular and supraventricular arrhythmia, and limb hypoperfusion.

- 1 Fartoukh M, Khalil A, Louis L, Carette MF, Bazelly B, Cadranel J, Mayaud C, Parrot A. An integrated approach to diagnosis and management of severe hemoptysis in patients admitted to the intensive care unit: a case series from a referral centre. *Respir Res* 2007; 8: 11.
- 2 Khalil A, Fedida B, Parrot A, Haddad S, Fartoukh M, Carette MF. Severe hemoptysis: From diagnosis to embolization. *Diagnostic and Interventional Imaging* 2015; 96: 775-788.

- 3 Panda A, Bhalla AS, Goyal A. Bronchial artery embolization in hemoptysis: a systematic review. *Diagn Interv Radiol* 2017; 23: 307-317.

**eTable 1**

Failure of the initial strategy, including bleeding recurrence at 30 and 90 days, and duration of follow-up in patients with mild-to-moderate hemoptysis allocated to a medical management strategy alone (M) or to the interventional strategy (I) with bronchial artery embolisation (BAE) in addition to medical management.

|                                                             | Patient No. | Treatment arm* | Initial bleeding amount, mL | Bleeding recurrence |            |                                | Follow-up |
|-------------------------------------------------------------|-------------|----------------|-----------------------------|---------------------|------------|--------------------------------|-----------|
|                                                             |             |                |                             | Date, d             | Amount, ml | Treatment                      | Days, no  |
| <b>Failure of the initial strategy (n=1)</b>                | 1           | I†             | 120                         | -                   | -          | -                              | 103       |
| <b>30-day bleeding recurrence, (n=18)</b>                   | 2           | M              | 150                         | D0                  | 50         | Intravenous terlipressin       | 130       |
|                                                             | 3           | M              | 150                         | D0                  | 50         | BAE                            | 138       |
|                                                             | 4           | M              | 110                         | D0                  | 70         | BAE                            | 90        |
|                                                             | 5           | M              | 100                         | D0                  | 80         | Supplemental oxygen            | 99        |
|                                                             | 6           | M              | 120                         | D0                  | 90         | Supplemental oxygen            | 90        |
|                                                             | 7           | M              | 200                         | D0                  | 180        | Supplemental oxygen            | 97        |
|                                                             | 8           | M              | 120                         | D0                  | 180        | BAE                            | 164       |
|                                                             | 9           | M              | 120                         | D1                  | 80         | BAE                            | 90        |
|                                                             | 10          | M              | 120                         | D1                  | 300        | BAE                            | 95        |
|                                                             | 11          | M              | 120                         | D2                  | 55         | BAE + supplemental oxygen      | 98        |
|                                                             | 12          | M              | 120                         | D2                  | 80         | Supplemental oxygen            | 91        |
|                                                             | 13          | M              | 140                         | D2                  | 210        | BAE                            | 90        |
|                                                             | 14          | M              | 120                         | D3                  | 290        | Intravenous terlipressin + BAE | 122       |
|                                                             | 15          | M              | 150                         | D3                  | 1000       | Mechanical ventilation         | 90        |
|                                                             | 16          | M              | 200                         | D5                  | 100        | BAE                            | 92        |
|                                                             | 17          | I              | 200                         | D0                  | 100        | Supplemental oxygen            | 48        |
|                                                             | 18          | I              | 150                         | D4                  | 50         | BAE                            | 104       |
|                                                             | 19          | I              | 120                         | D8                  | 100        | BAE                            | 40        |
| <b>Bleeding recurrence status unknown at day 30, (n=2)‡</b> | 20          | M              | 110                         | -                   | -          | -                              | 29        |
|                                                             | 21          | M              | 160                         | -                   | -          | -                              | 2         |
| <b>Bleeding recurrence status unknown at day 90, (n=2)‡</b> | 22          | M              | 200                         | -                   | -          | -                              | 74        |
|                                                             | 23          | I              | 100                         | -                   | -          | -                              | 67        |

Abbreviations: d day; BAE: bronchial artery embolization

D0 is the day on which the strategy was applied

\* Treatment arm: I, interventional (BAE); M: medical

† technical failure of BAE

‡ None of these patients had recurrent bleeding documented at time of loss to follow-up.

The rate of hospital readmission or invasive treatment for bleeding recurrence in patients followed-up to day 90 was 25.7% (9/35) in the medical strategy group and 6.3% (2/32) in the interventional strategy group (difference 19.5%, 95% CI 2.7 to 36.2,  $P=.032$ ).

**e-Table 2.** In-hospital complications related to the intervention

| <b>Complication</b>                                                  | <b>Date of diagnosis</b> | <b>Intensity</b> | <b>Management and follow-up</b>                                                                                                 |
|----------------------------------------------------------------------|--------------------------|------------------|---------------------------------------------------------------------------------------------------------------------------------|
| local groin puncture<br>hematoma                                     | D0                       | minor            | none<br>spontaneous resolution (D18)                                                                                            |
| bronchial artery dissection                                          | D0                       | minor            | none                                                                                                                            |
| acute renal dysfunction                                              | D2                       | minor            | none<br>spontaneous resolution (D6)                                                                                             |
| spinal cord ischemia;<br>splenic, renal and<br>pancreatic infarction | D1                       | major            | - paresis, resolving with rehabilitation care<br>- splenic, renal and pancreatic infarction,<br>resolution at 6-month follow-up |

D0 = day on which the strategy was applied.
